# Supplementary material for: Engineered red blood cell membrane for sensitive and precise electrochemical detection of salivary exosomes
Source: Royal Society of Chemistry journal article supplement (doi:10.1039/d1ay01507a), 2021-01-01
Supplement: d1ay01507a1.pdf [file d1ay01507a1.pdf]

## Supplementary Information

### **Engineered red blood cell membrane for sensitive and precise electrochemical detection of salivary exosomes**

Libang He<sup>a,\*</sup>, Meiying Shao<sup>a</sup>, Jue Xu<sup>a</sup> and Hao Chen<sup>b</sup>

<sup>a</sup> State Key Laboratory of Oral Diseases & National Clinical Research Center for Oral Diseases  
& Department of Cariology and Endodontics, West China Hospital of Stomatology & West  
China School of Public Health & West China Fourth Hospital, Sichuan University, Chengdu  
610041, Sichuan, China

<sup>b</sup> School of Medicine, Tongji University, Shanghai 200072, China

**Table S1** Sequences of DNA probes used in this work

---

| DNA probes  | Sequence (from 5' to 3')                         |
|-------------|--------------------------------------------------|
| AP          | Cholesterol-TTTTTT-CACCCACCTCGCTCCCGTGACTAATGCTA |
| AP1         | TTTTTT-CACCCACCTCGCTCCCGTGACTAATGCTA             |
| Ap2         | Cholesterol-TTTTTT-AGAGGTAAGTTATTAGAGCAGA        |
| CP          | FAM-TAGCATTAGTGTCACGGGA                          |
| SP          | SH-TTTTTT-CACCCACCTCGCTCCCGTGACTAATGCTA          |
| Control SP  | SH-TTTTTT-CTGCTCTAATAACTTACC                     |
| Cy5-aptamer | CACCCACCTCGCTCCCGTGACTAATGCTA-TTTTTT-Cy5         |

---

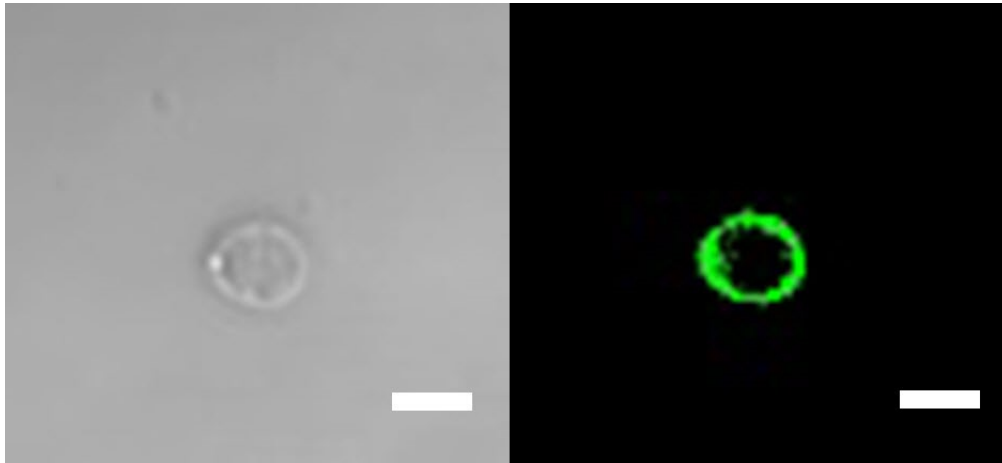

**Fig. S1** Representative optical and fluorescence images of RBC. For fluorescence imaging, RBC was stained by membrane dye DiO. Scar bars, 5  $\mu\text{m}$ .

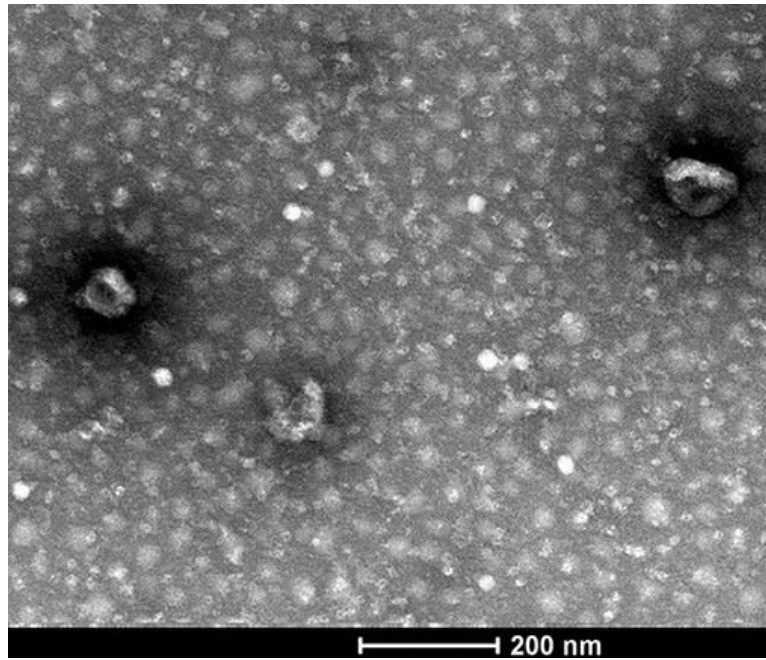

**Fig. S2** TEM image of CAL27 cell-derived exosomes.

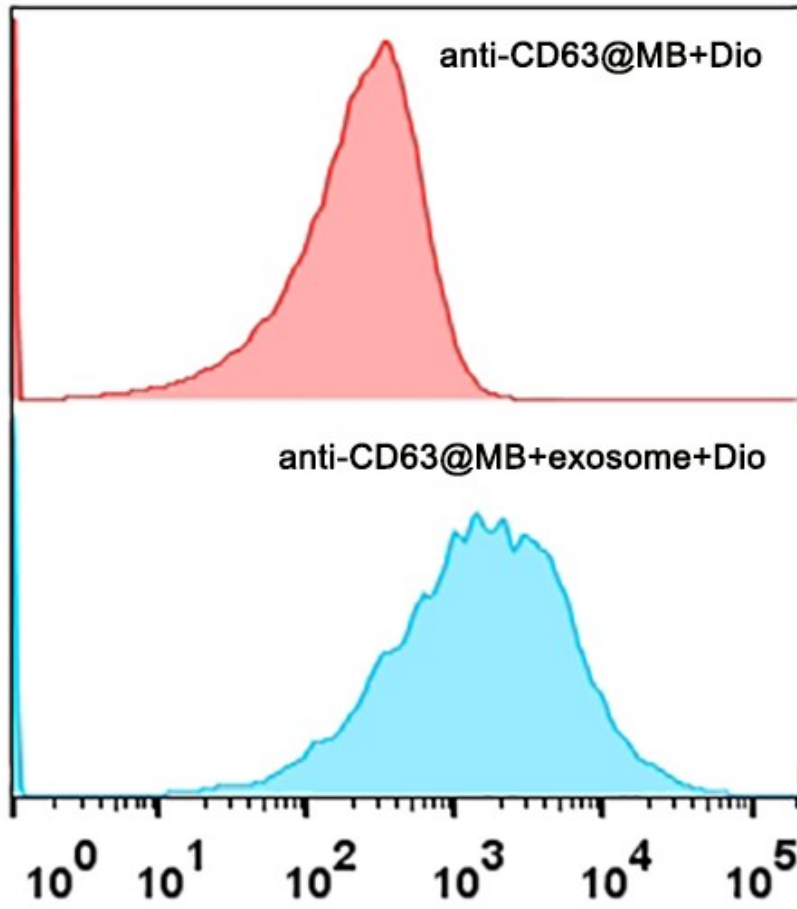

**Fig. S3** Flow cytometry analysis of CAL27 cell-derived exosomes captured by anti-CD63@MB after Dio staining.

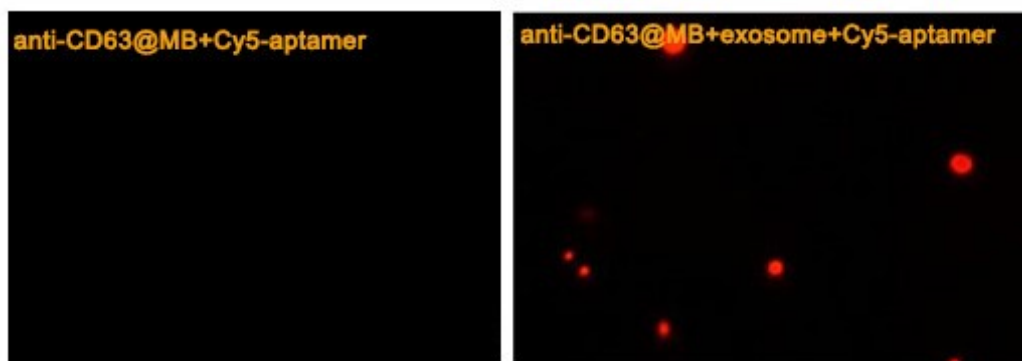

**Fig. S4** Fluorescence images of CAL27 cell-derived exosomes captured by anti-CD63@MB with Cy5-labelled CD63 aptamer incubation.

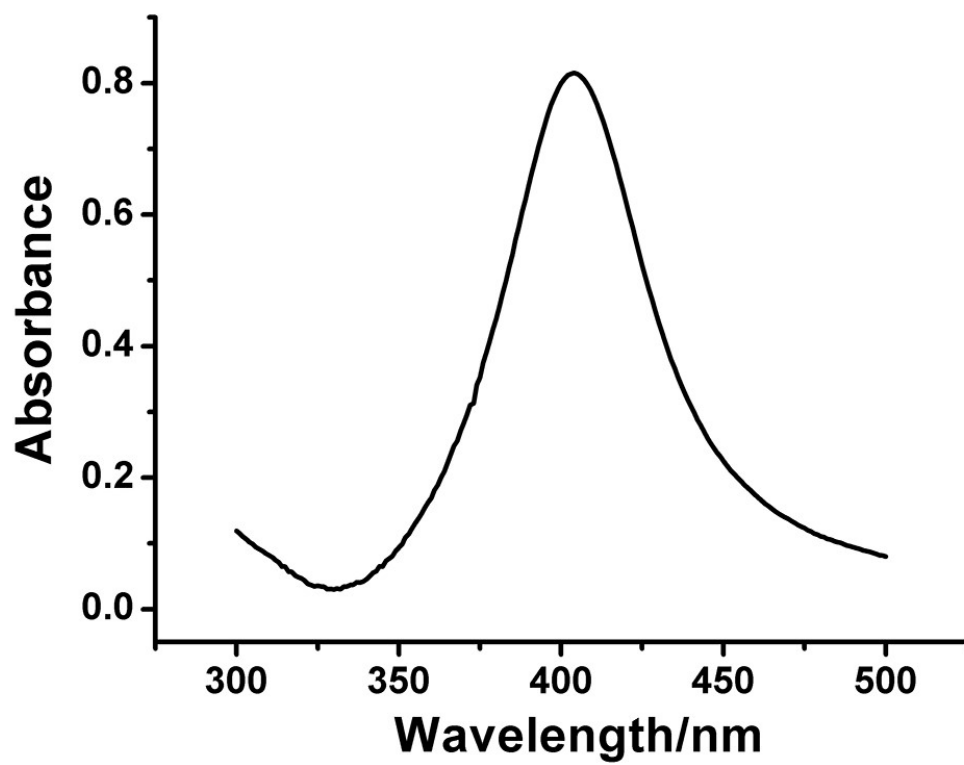

Fig. S5 UV-Vis spectrum of SP-AgNPs.

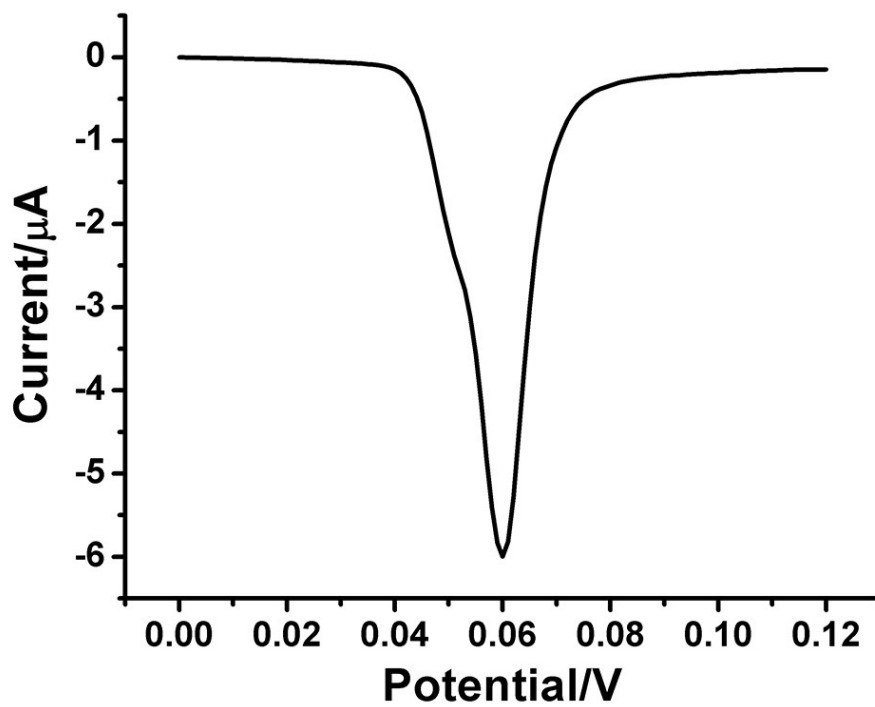

Fig. S6 LSV response of SP-AgNPs.



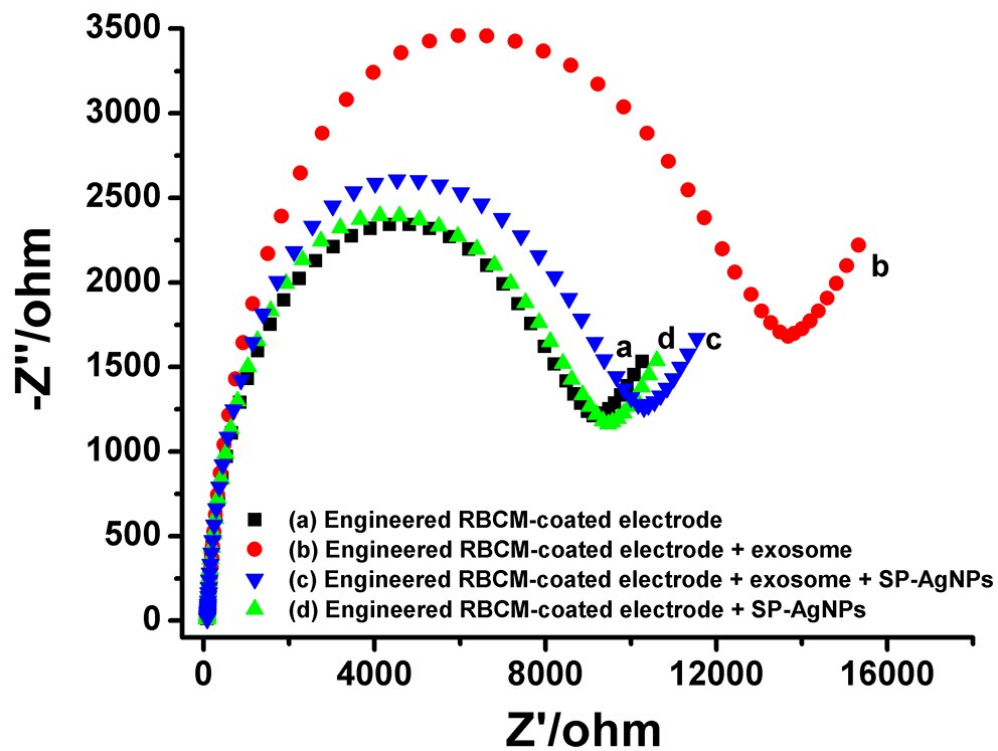

**Fig. S7** Nyquist spectra of (a) engineered RBCM-coated electrode, and engineered RBCM-coated electrode with the treatment of (b) CAL27 cell-derived exosomes and (c) SP-AgNPs in sequence. Curve d corresponds to the Nyquist spectrum of engineered RBCM-coated electrode with the treatment of SP-AgNPs.

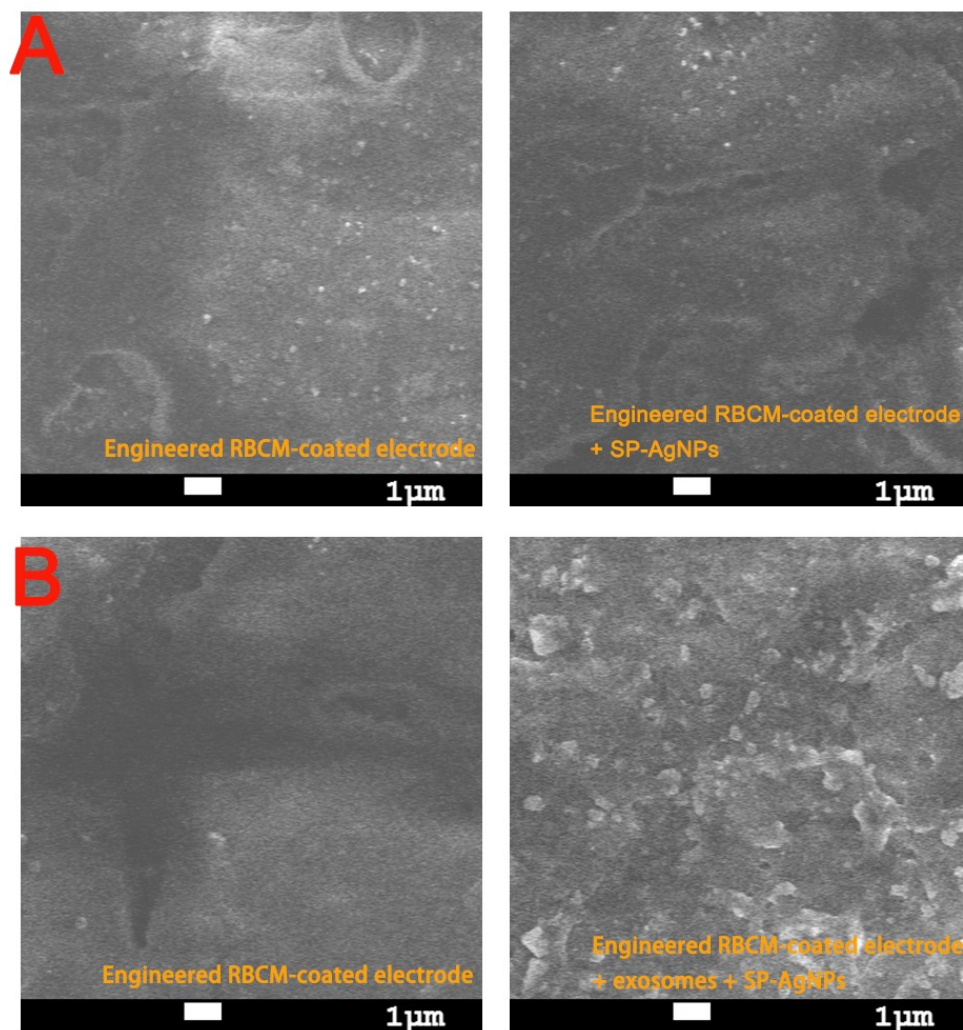

**Fig. S8** SEM images of the engineered RBCM-coated electrode collected before and after treatment of SP-AgNPs: (A) in the absence of CAL27 cell-derived exosomes and (B) in the presence of CAL27 cell-derived exosomes.

**Table S2** Comparison of recently reported methods for exosome detection

| Method                                                                                         | Detection limit (particles/mL) | Linear range (particles/mL)               | Reference |
|------------------------------------------------------------------------------------------------|--------------------------------|-------------------------------------------|-----------|
| Electrochemical method using catalytic molecule machine                                        | $1.72 \times 10^4$             | $1 \times 10^5$ to $5 \times 10^7$        | [1]       |
| Electrochemical method based on DNA amplification-responsive metal-organic frameworks          | $3.34 \times 10^2$             | $1 \times 10^3$ to $1 \times 10^{10}$     | [2]       |
| Electrochemical method based on metal-organic framework-functionalized paper                   | $5 \times 10^3$                | $1.7 \times 10^4$ to $3.4 \times 10^8$    | [3]       |
| Electrochemical method using Zr-based metal-organic frameworks                                 | $7.83 \times 10^6$             | $9.5 \times 10^6$ to $1.9 \times 10^{10}$ | [4]       |
| Fluorescence method based on combined aptamer recognition and quantum dot signal amplification | $5 \times 10^2$                | $1.6 \times 10^5$ to $1.6 \times 10^8$    | [5]       |
| Fluorescence method based on branched rolling circle amplification                             | $4.27 \times 10^4$             | $1 \times 10^5$ to $1 \times 10^9$        | [6]       |
| Electrochemical method using engineered RBCM                                                   | $2.07 \times 10^2$             | $5 \times 10^2$ to $1 \times 10^6$        | This work |

**References**

1. Y. Cao, L. Li, B. Han, Y. Wang, Y. Dai and J. Zhao, *Biosens. Bioelectron.* 2019, **141**, 111397.
2. Y. Cao, Y. Wang, X. Yu, X. Jiang, G. Li and J. Zhao, *Biosens. Bioelectron.* 2020, **166**, 112452.
3. X. Liu, X. Gao, L. Yang, Y. Zhao and F. Li, *Anal. Chem.* 2021, **93**, 11792-11799.
4. Z. Sun, L. Wang, S. Wu, Y. Pan, Y. Dong, S. Zhu, J. Yang, Y. Yin and G. Li, *Anal. Chem.* 2020, **92**, 3819-3826.
5. M. Wu, Z. Chen, Q. Xie, B. Xiao, G. Zhou, G. Chen and Z. Bian, *Biosens. Bioelectron.* 2021, **171**, 112733.
6. R. Huang, L. He, S. Li, H. Liu, L. Jin, Z. Chen, Y. Zhao, Z. Li, Y. Deng and N. He, *Nanoscale* 2020, **12**, 2445-2451.

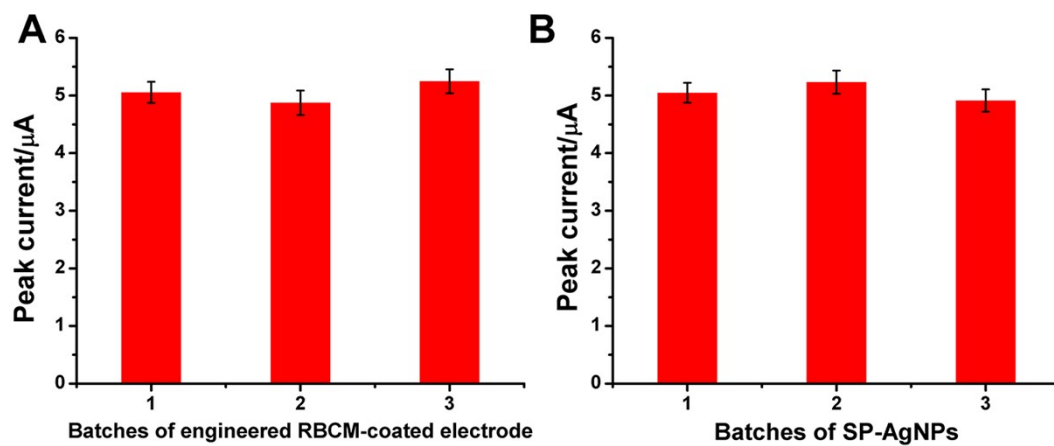

**Fig. S9** LSV peak currents for detecting  $1 \times 10^6$  CAL27 cell-derived exosomes with the use of three different batches of (A) engineered RBCM-coated electrodes and (B) SP-AgNPs.
